# Supplementary material for: IR780-based light-responsive nanocomplexes combining phase transition for enhancing multimodal imaging-guided photothermal therapy
Source: Royal Society of Chemistry journal article supplement (doi:10.1039/c8bm01524d), 2019-01-01
Supplement: c8bm01524d1.pdf [file c8bm01524d1.pdf]

## Supporting information for

# IR780-based light-responsive nanocomplexes combining phase transition for enhancing multimodal imaging and photothermal therapy

Mingzhu Liu<sup>1</sup>, Ping Zhang<sup>1,2,\*</sup>, Liming Deng<sup>1</sup>, Dan Guo<sup>1</sup>, Mixiao Tan<sup>1</sup>, Ju Huang<sup>1</sup>, Yuanli Luo<sup>1</sup>, Yang Cao<sup>1</sup>, Zhigang Wang<sup>\*1,2</sup>

<sup>1</sup>Chongqing Key Laboratory of Ultrasound Molecular Imaging, <sup>2</sup>Department of Ultrasound, Institute of Ultrasound Imaging, The Second Affiliated Hospital of Chongqing Medical University, Chongqing 400010, China

\*Corresponding authors: Prof. Zhigang Wang and Ping Zhang are co-corresponding authors. Tel: 86-023-63809616 E-MAIL: [303507@hospital.cqmu.edu.cn](mailto:303507@hospital.cqmu.edu.cn).

### 1. Calculation of the photothermal conversion efficiency is as follows:

The photothermal conversion efficiency ( $\eta$ ) of cRGD-PLGA-IR780-PFP was calculated as follows.<sup>1,2</sup> 200  $\mu$ l of the cRGD-PLGA-IR780-PFP aqueous solutions (5 mg/ml) were exposed to the 808 nm NIR laser (2 W/cm<sup>2</sup>, 5 min), and then, the laser was turned off. The heating and cooling temperature patterns of samples were recorded an IR thermal camera and  $\eta$  was calculated according to Eq. (1):

$$\eta = \frac{hS(T_{Max} - T_{Surr}) - Q_0}{I(1 - 10^{-A_{808}})} \quad (1)$$

Where h and S are the heat transfer coefficient and the sample container surface area, respectively. Tmax is the steady state equilibrium temperature, Tsurr is ambient temperature of the surroundings. Q<sub>0</sub> is the baseline energy input by the solvent and sample container without cRGD-PLGA-IR780-PFP, I is the laser power, and the A<sub>808</sub> is the absorbance (2.207) of cRGD-PLGA-IR780-PFP in 808 nm.

The hS can be measured by Eq. (2):

$$\tau_s = \frac{\sum_i m_i C_{p,i}}{hS} \quad (2)$$

Where m and C<sub>p</sub> are the mass and heat capacity of water, respectively. The heat capacity (C<sub>p</sub>) is about 4.2 J. g<sup>-1</sup>. k<sup>-1</sup> (heat capacity of water).

The Q<sub>0</sub> was measured by Eq. (3):

$$Q_0 = hS (T_{Max} - T_{Surr}) \quad (3)$$

The time constant was  $\tau s = 175.35$  s based on the linear time data from cooling period after 300 s vs  $-\ln\theta$ . Therefore, the photothermal conversion efficiency calculated by the above Eqs was  $\eta = 10.58\%$ .

## 2. Supporting figures

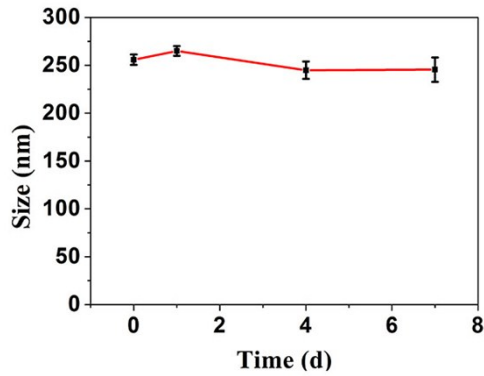

Figure S1. The changes in mean size of cRGD-PLGA-IR780-PFP NPs during 7 days at room temperature measured by dynamic light scattering.

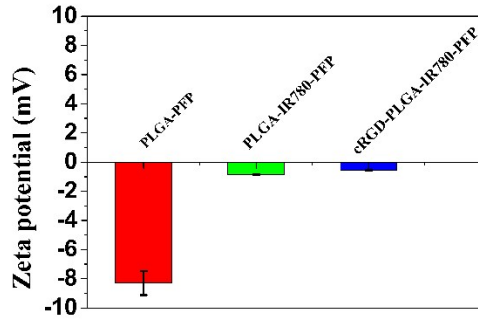

Figure S2. The mean zeta potential of various NPs (PLGA-PFP, PLGA-IR780-PFP

and cRGD-PLGA-IR780-PFP) measured by dynamic light scattering.

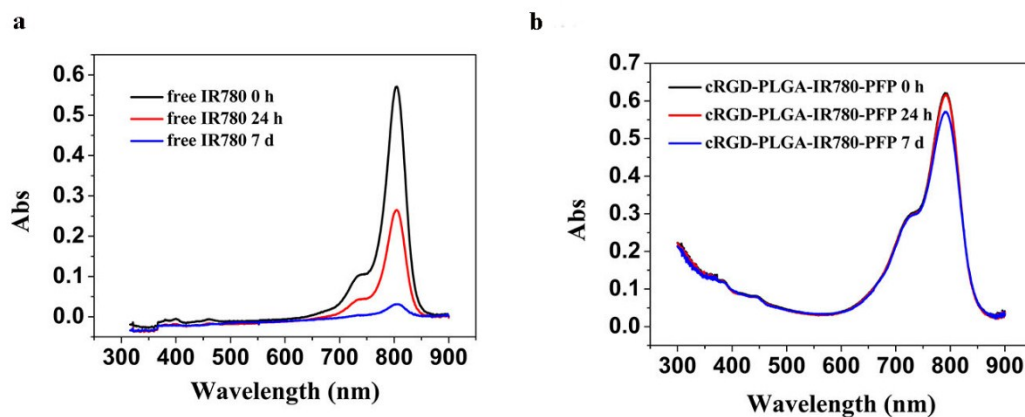

Figure S3. (A, B) US-vis-NIR absorption spectrum of free IR780 and cRGD-PLGA-IR780-PFP storing in daylight over a period of 7 days.

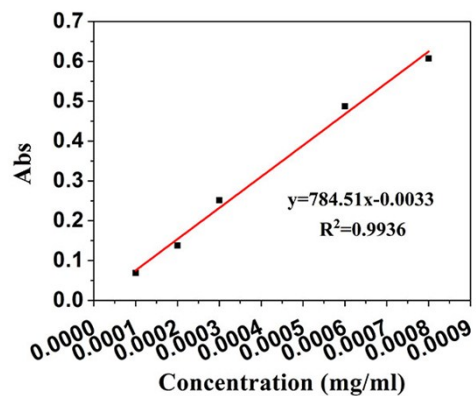

Figure S4. The standard curve of IR780 measured by US-vis-NIR absorption spectrum.

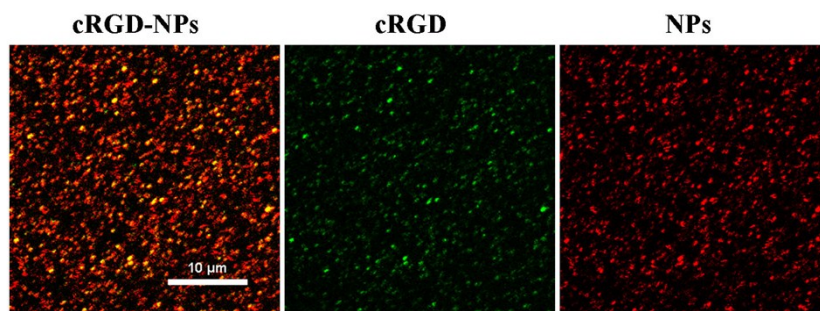

Figure S5. Confocal microscope images of cRGD-NPs (cRGD-PLGA-IR780-PFP). The NPs shell was labelled with DiI, and the cRGD peptide were marked with FITC.

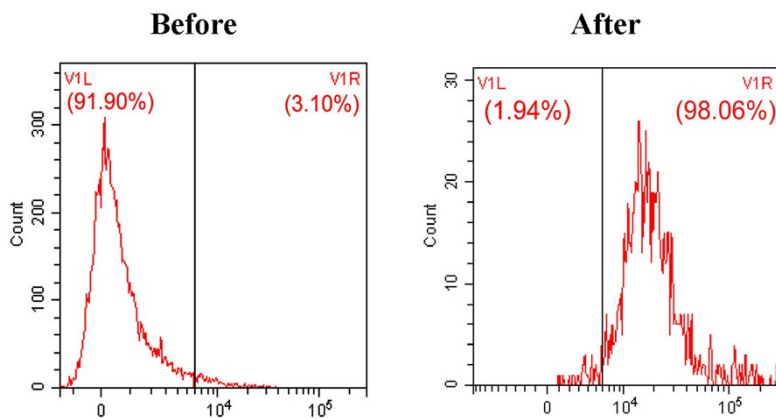

Figure S6. Flow-cytometry results of nanoparticles before and after being conjugated with FITC labeled-cRGD peptide.

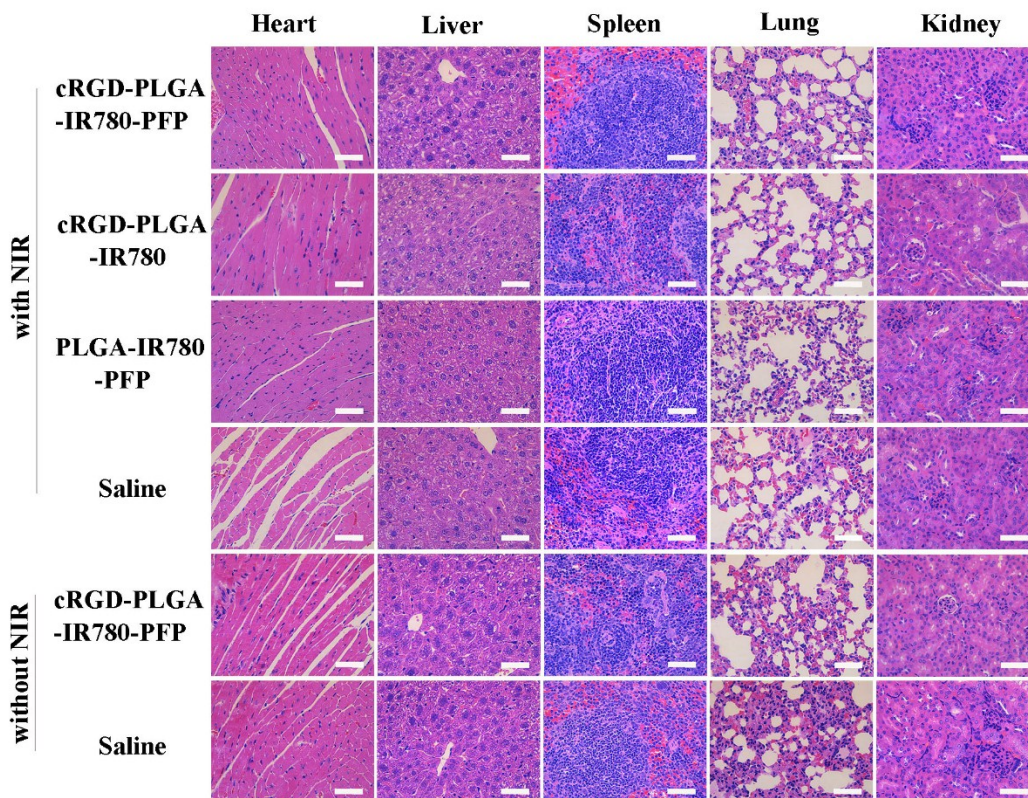

Figure S7. HE staining of major organs and tumors of different groups on the 2<sup>nd</sup> day after various treatments. (scale bar is 50  $\mu$ m).

## Reference

- [1] X. Xu, X. Liu, L. Tan, Z. Cui, X. Yang, S. Zhu, Z. Li, X. Yuan, Y. Zheng, K.W.K. Yeung, P.K. Chu, S. Wu, *Acta biomaterialia*, 2018, **77**, 352-364.
- [2] L. Deng, X. Cai, D. Sheng, Y. Yang, E.M. Strohm, Z. Wang, H. Ran, D. Wang, Y. Zheng, P. Li, T. Shang, Y. Ling, F. Wang, Y. Sun, *Theranostics*, 2017, **7**, 4410-4423.
